# Supplementary material for: Postponing Pregnancy Through Oocyte Cryopreservation for Social Reasons: Considerations Regarding Clinical Practice and the Socio-Psychological and Bioethical Issues Involved
Source: MDPI journal article supplement (doi:10.3390/medicina54050076), 2018-10-25
Supplement: s1 [file s1]

## Supplementary Table 1

Search Strategy for Pubmed/Medline as performed on the 23<sup>rd</sup> of June 2018.

1. Freezing OR cryopreservation OR vitrification
2. #1 AND oocyte
3. #1 AND social
4. #2 AND #3
5. #2 AND bioethics
6. #2 AND psychosocial
7. #4 OR #5 OR #6
